# Supplementary material
Source: MDPI journal article supplement (https://www.mdpi.com/2073-4441/16/10/1347)
Supplement: s1 [file s1]

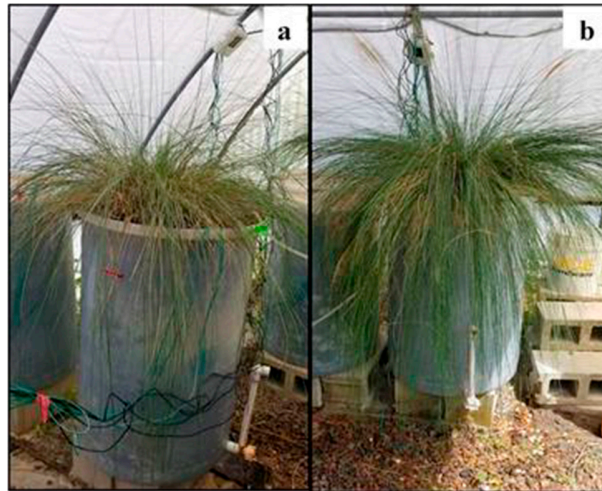

**Figure S1.** Photographs of planted pilot-scale bioretention systems after twelve runoff experiments: (a) S+P system; (b) BC+P system.

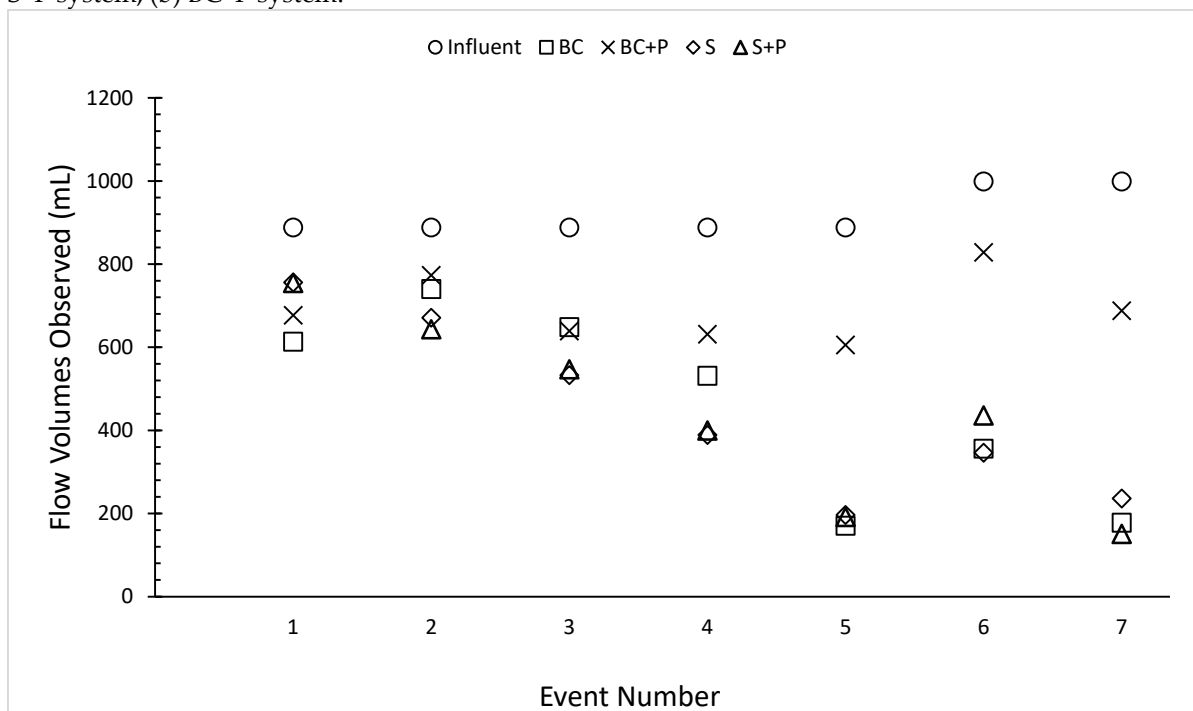

**Figure S2.** Effluent flow volumes for each event.

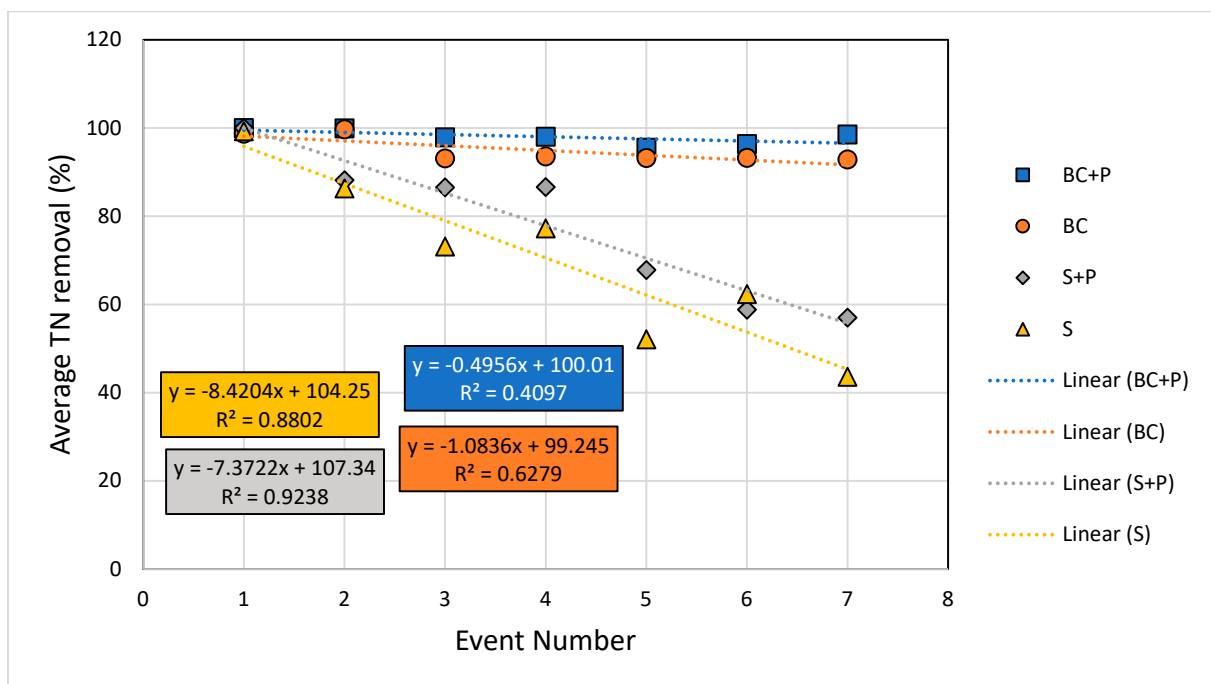

**Figure S3.** Regression analysis of average TN removal vs. runoff event.

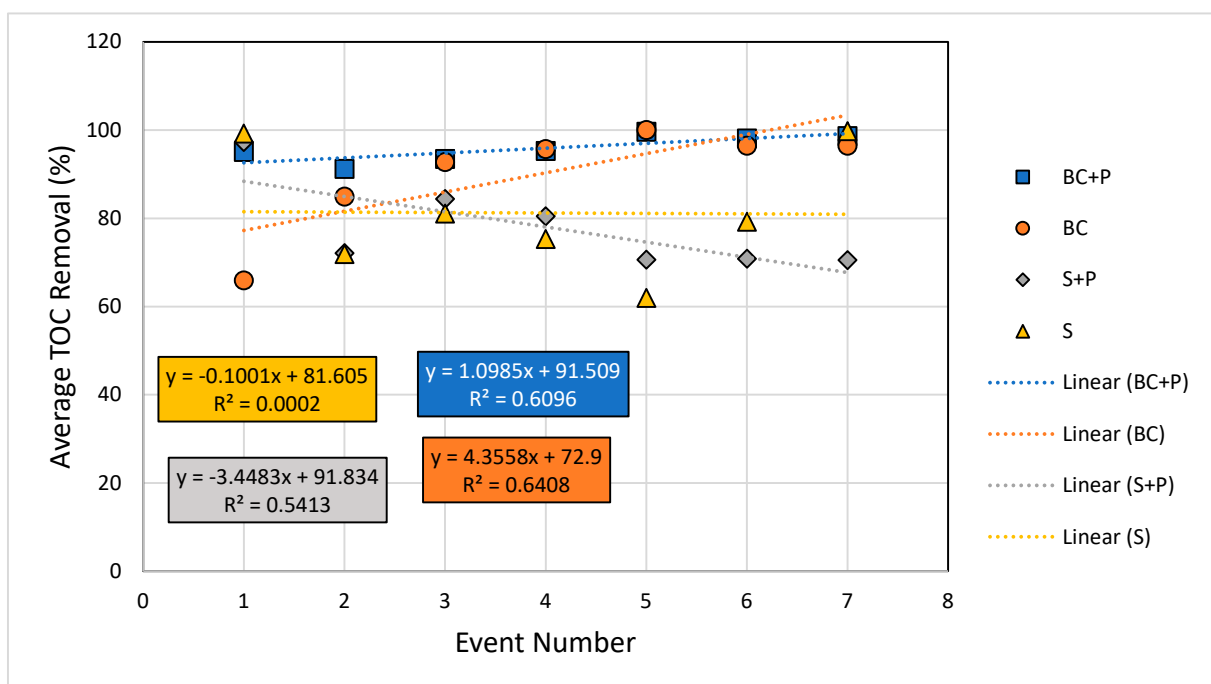

**Figure S4.** Regression analysis of average TOC removal vs. runoff event.

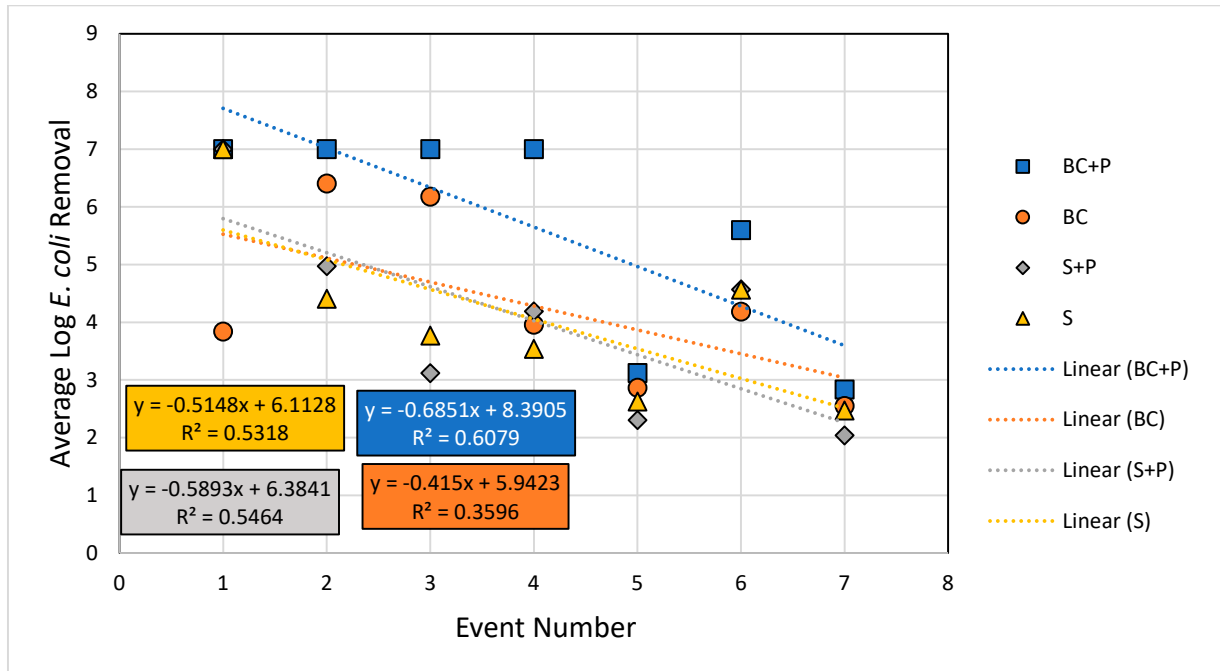

**Figure S5.** Regression analysis of average *log E. coli* removal vs. runoff event.

**Table S1.** List of abbreviations.

| Acronym | Definition                            |
|---------|---------------------------------------|
| ADP     | Antecedent Dry Period                 |
| CEC     | Cation Exchange Capacity              |
| CAFO    | Concentrated Animal Feeding Operation |
| DON     | Dissolved Organic Nitrogen            |
| FIB     | Fecal Indicator Bacteria              |
| HLR     | Hydraulic Loading Rate                |
| IWSZ    | Internal Water Storage Zone           |
| NBS     | Nature Based Solution                 |
| PV      | Pore Volume                           |
| SA      | Surface Area                          |
| TN      | Total Nitrogen                        |
| TOC     | Total Organic Carbon                  |
